# Supplementary material
Source: PubMed Central journal article supplement (PMC5927829)

# Supplementary Fig. 1

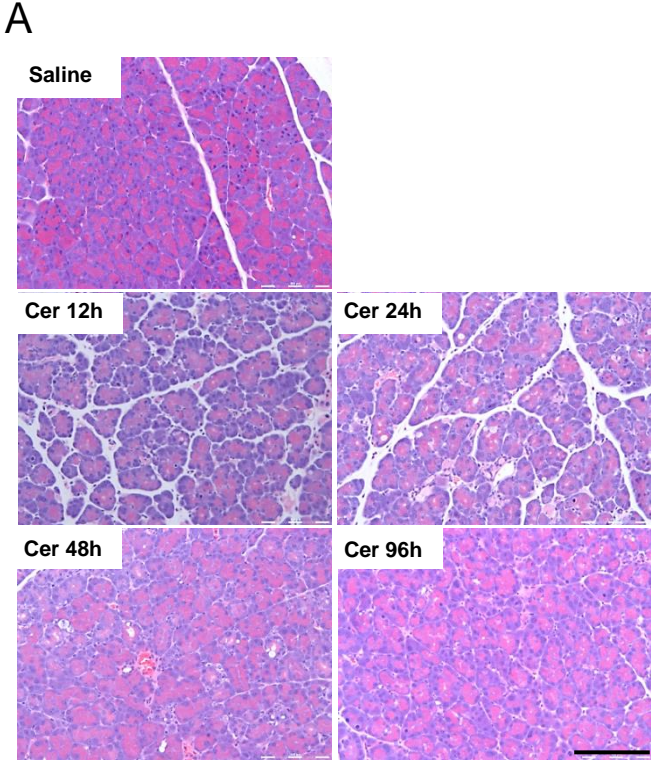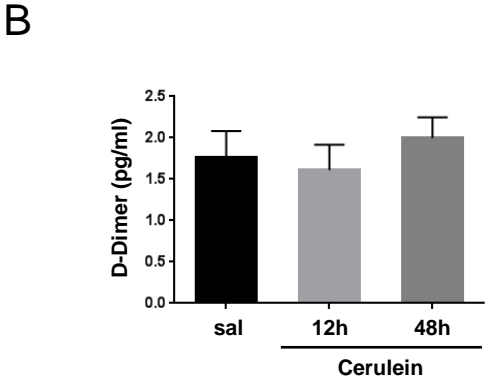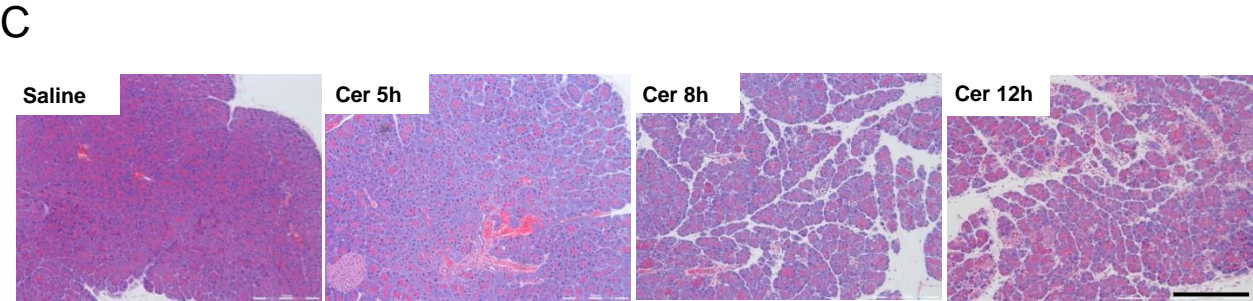

Supplementary Fig. 2

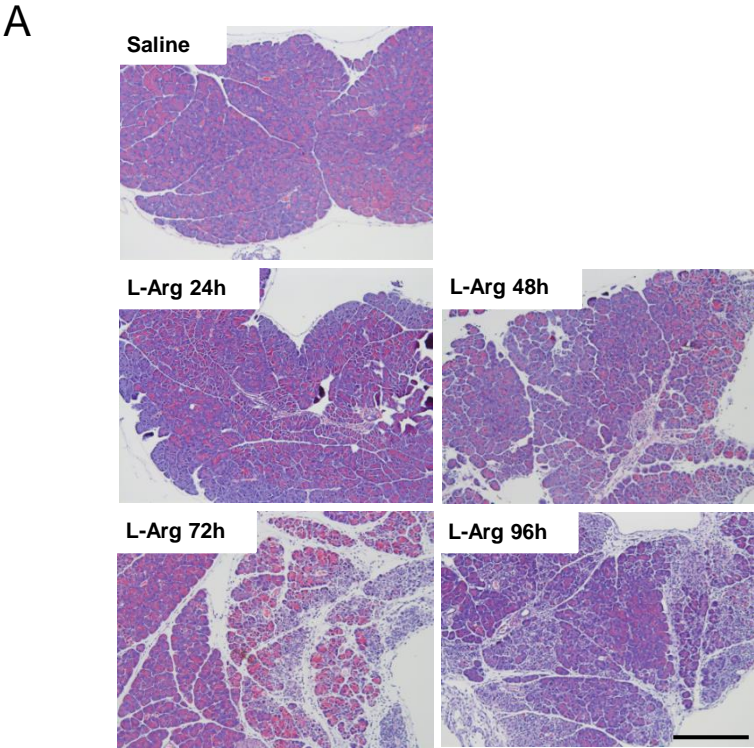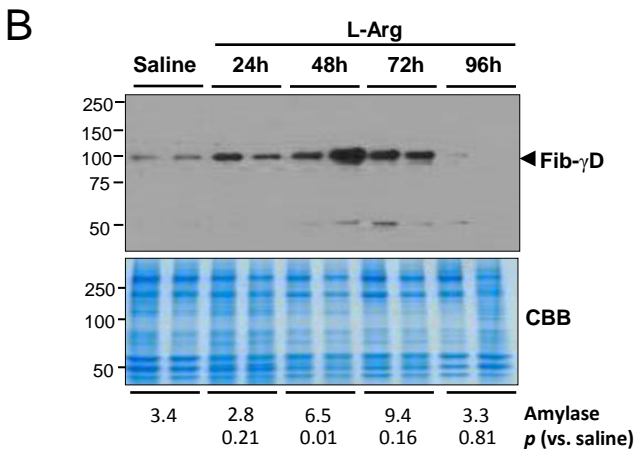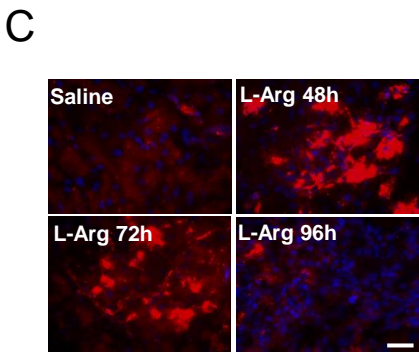

Supplementary Fig. 3

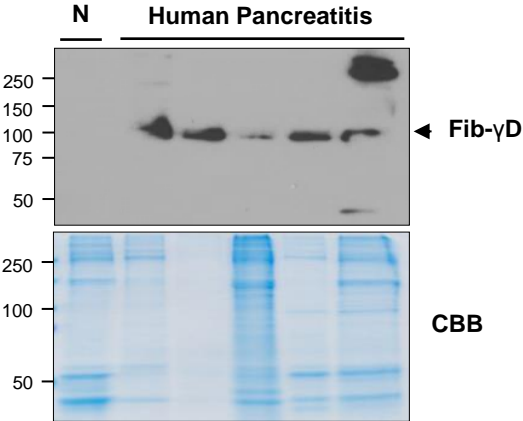

# Supplementary Fig. 4

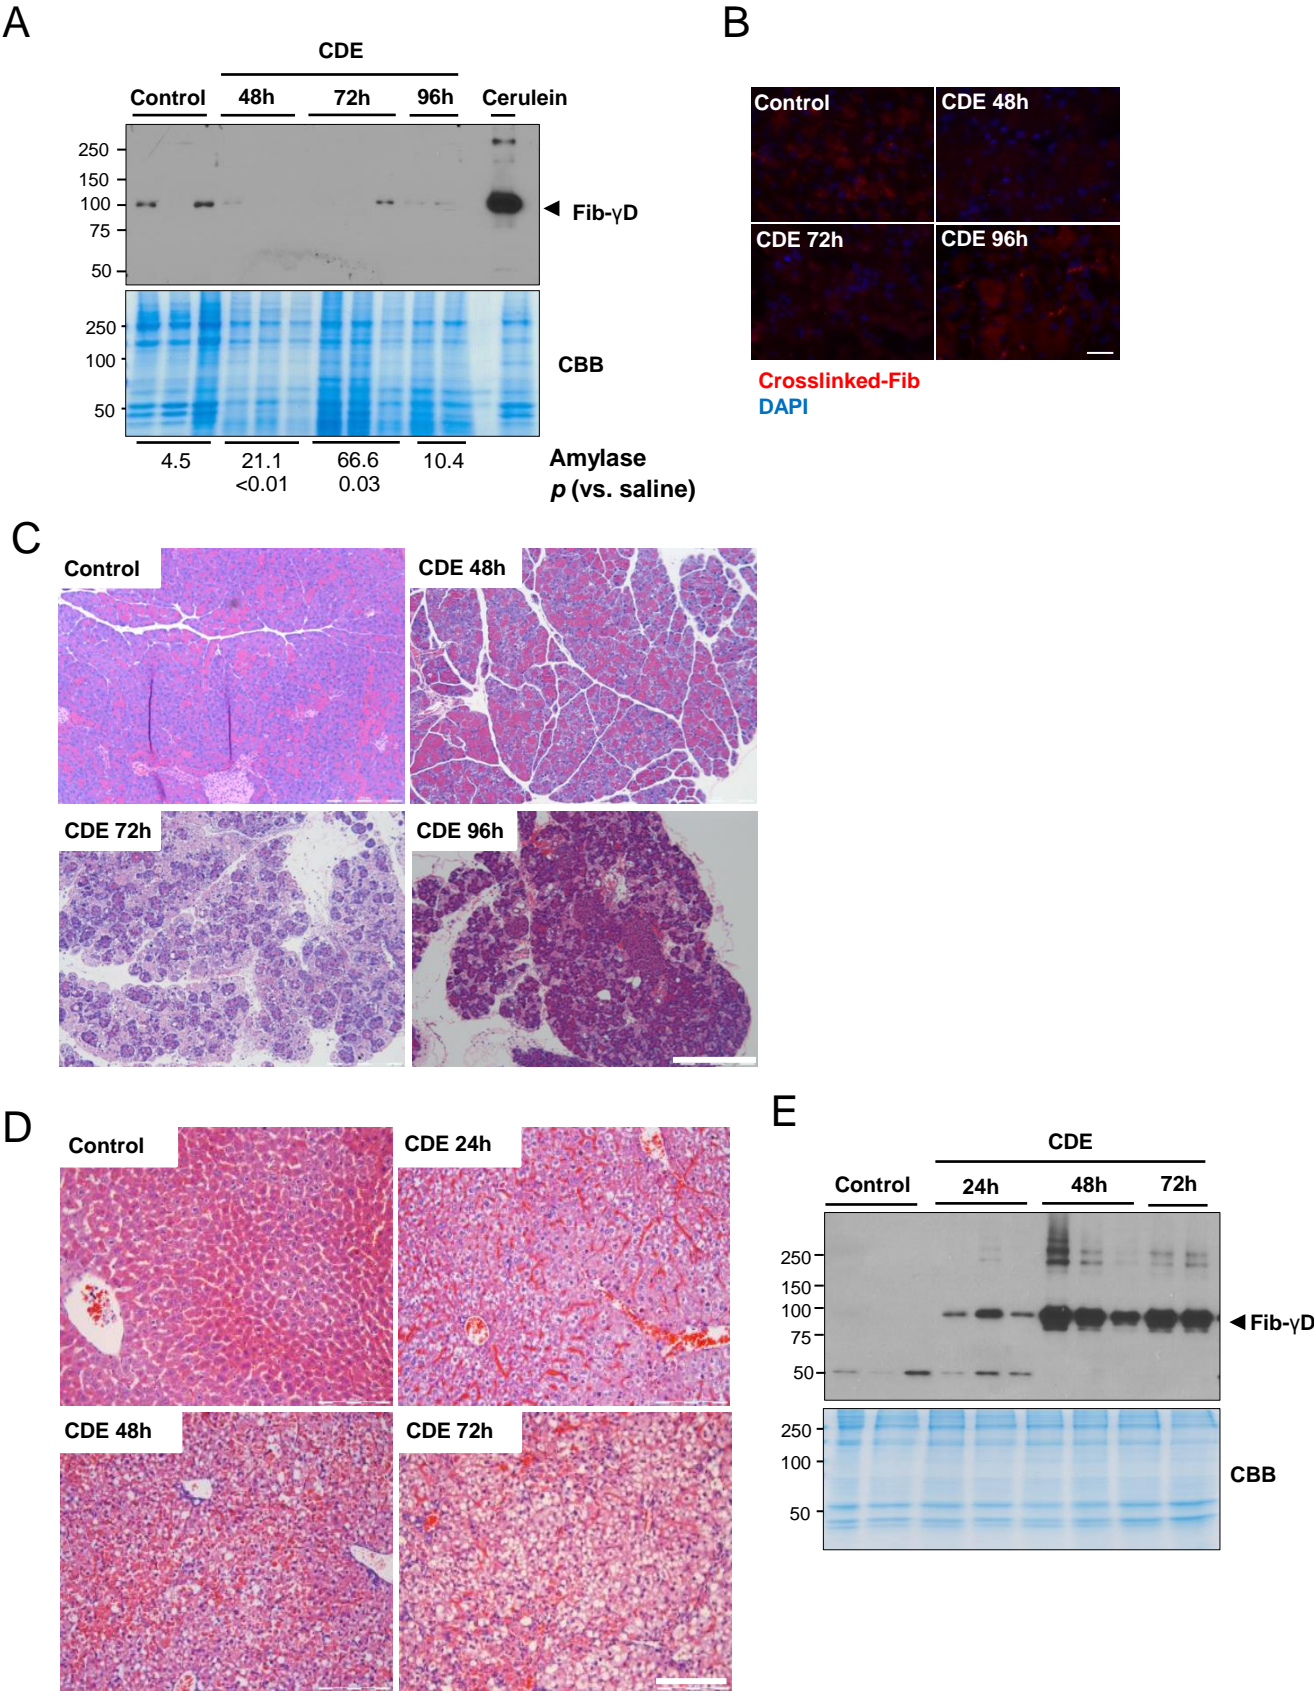

# Supplementary Fig. 5

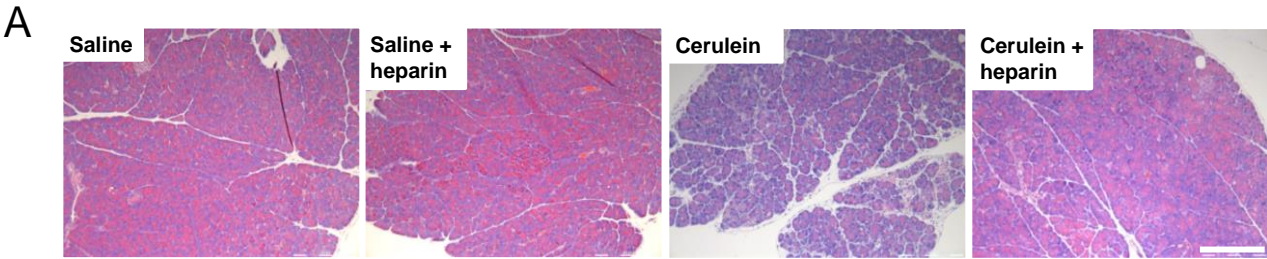

**B**

|                           | Saline<br>(n=6) | Saline +<br>heparin<br>(n=6) | Cerulein*<br>(n=8) | Cerulein +<br>heparin*<br>(n=12) | p value* |
|---------------------------|-----------------|------------------------------|--------------------|----------------------------------|----------|
| Interstitial edema        | 0.00            | 0.00                         | 2.00               | 1.33                             | < 0.001  |
| Intracellular vacuoles    | 0.00            | 0.00                         | 3.00               | 1.92                             | < 0.001  |
| Inflammatory infiltration | 0.00            | 0.00                         | 2.38               | 1.75                             | < 0.03   |
| Parenchyma necrosis       | 0.00            | 0.00                         | 2.63               | 1.58                             | 0.001    |
| Parenchyma hemorrhage     | 0.00            | 0.00                         | 1.00               | 0.33                             | < 0.007  |

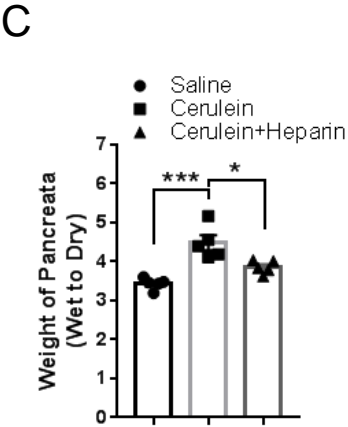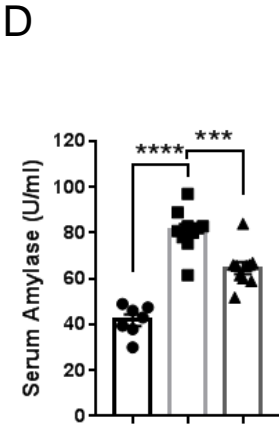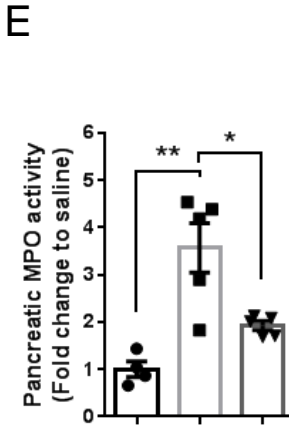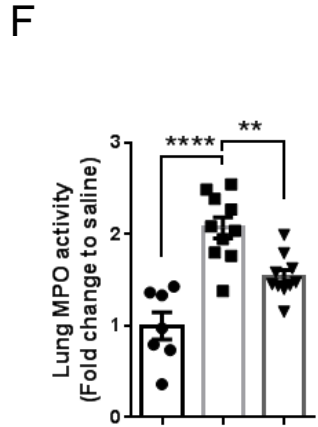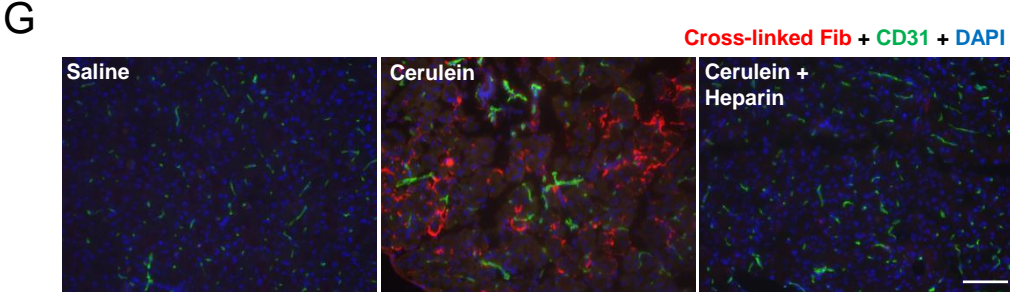

Supplementary Fig. 6

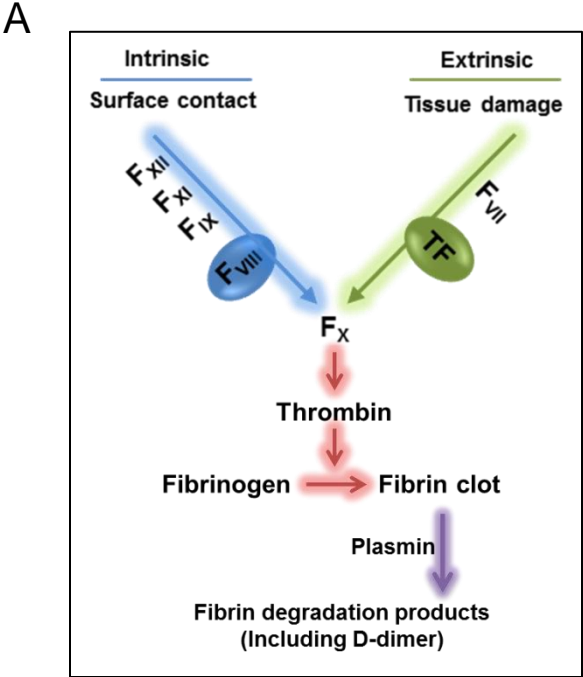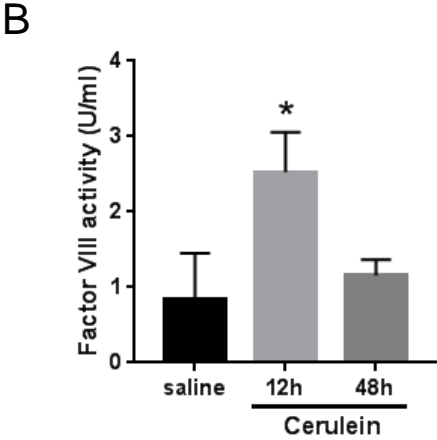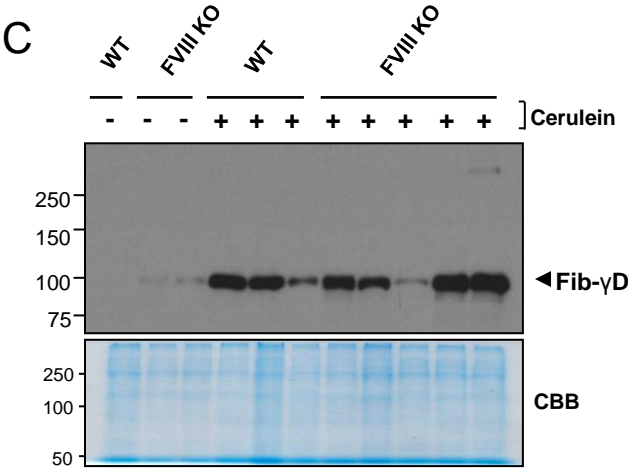

# Supplementary Fig. 7

## A

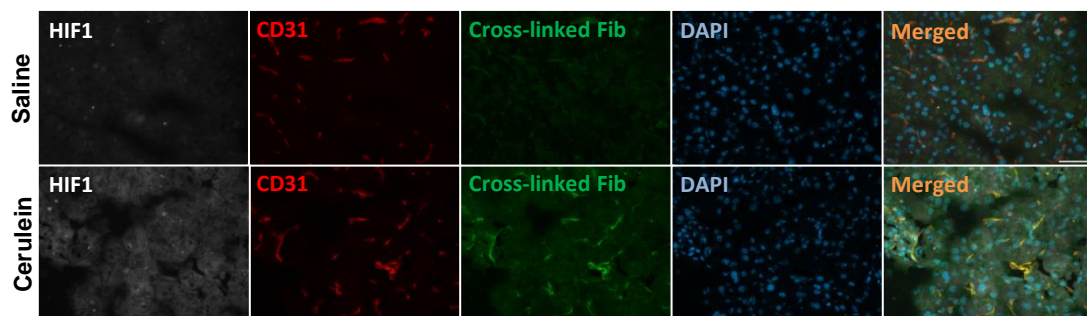

## B

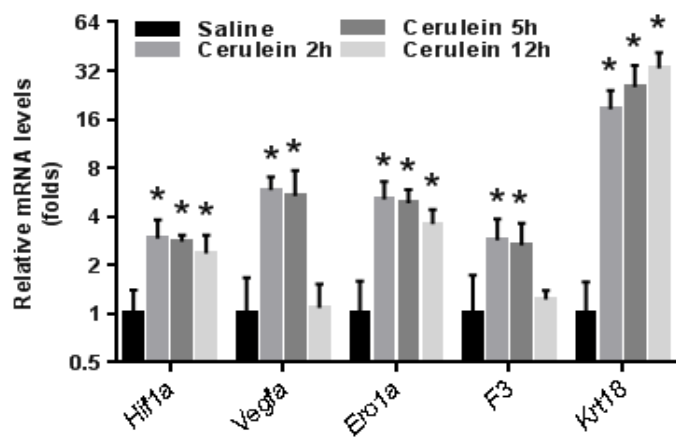

Supplementary Fig. 8

A

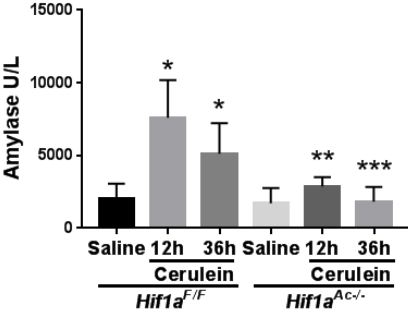

B

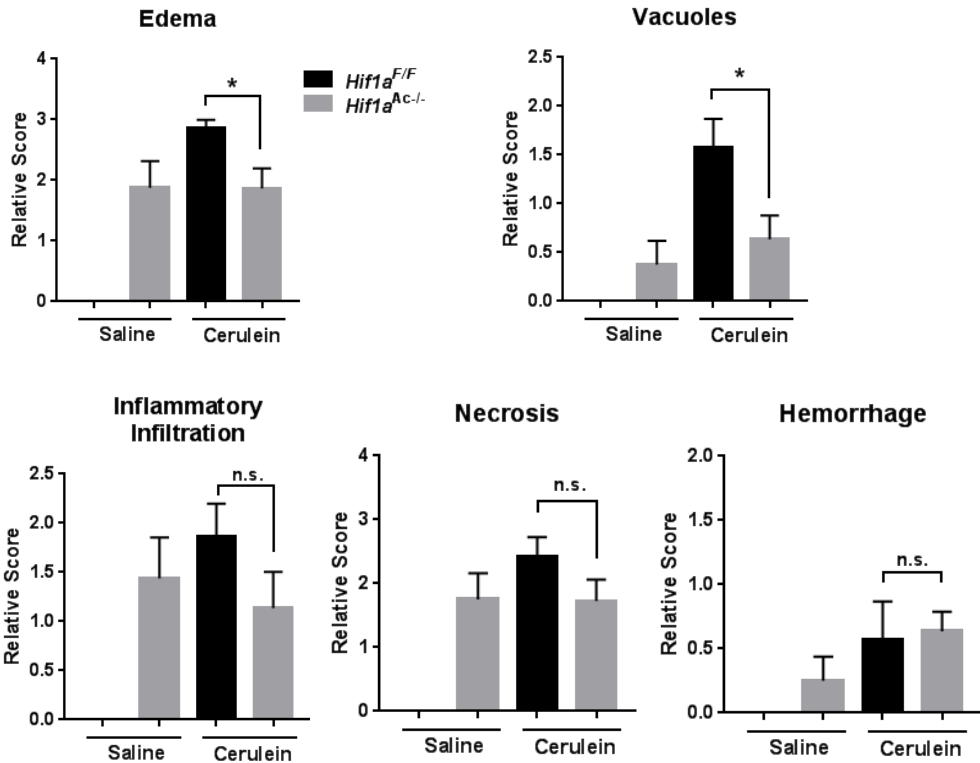



# Supplementary Fig. 9

**A**

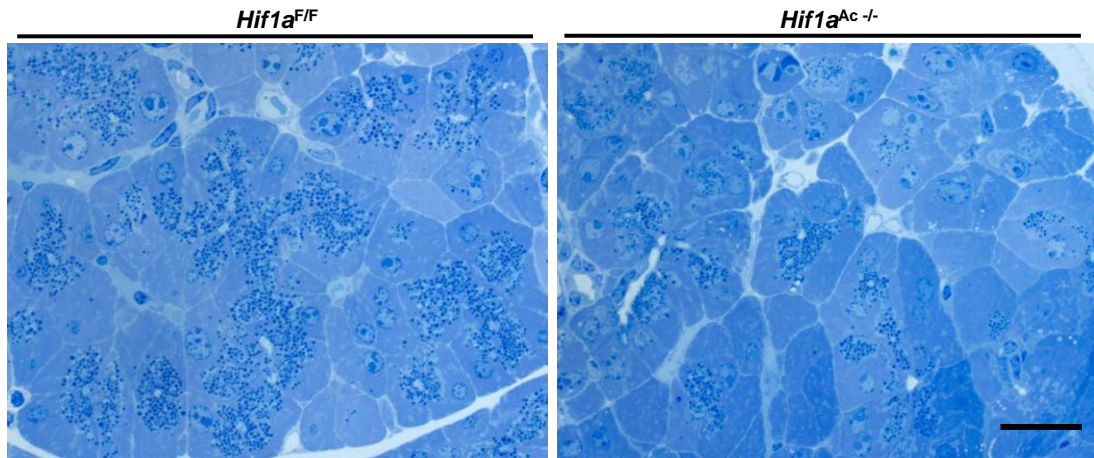

**B**

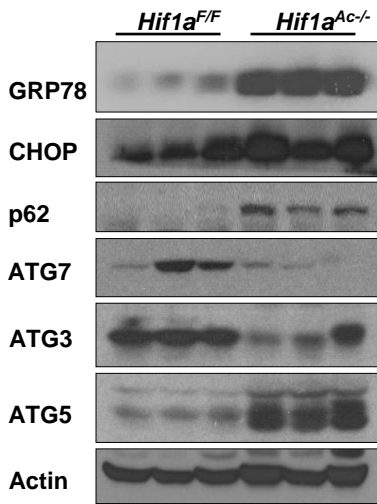

**C**

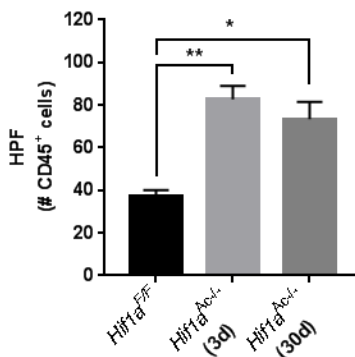

**D**

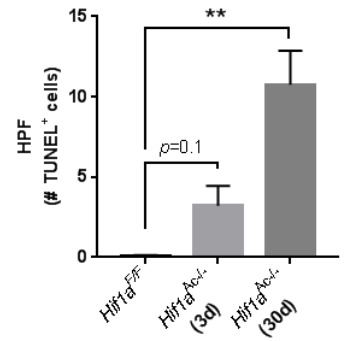

**E**

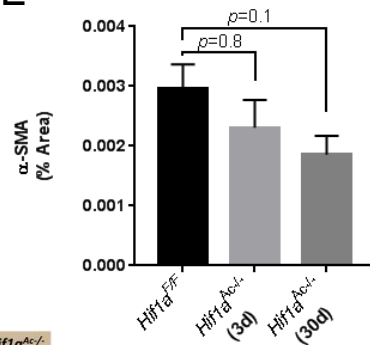

**F**

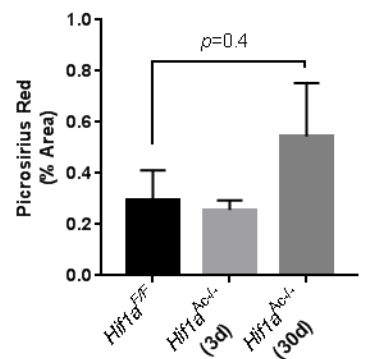

**G**

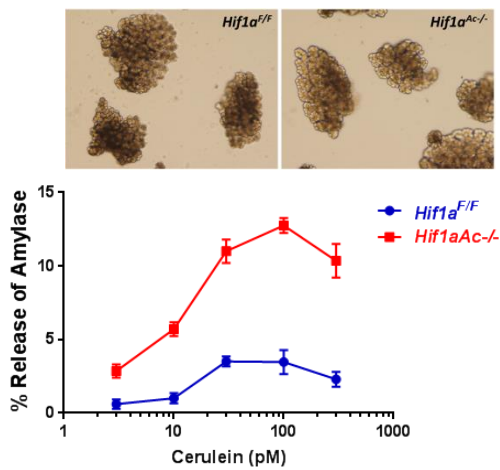

**H**

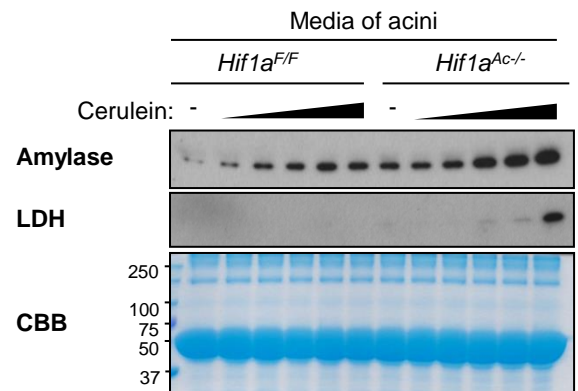

# Supplementary Fig. 10

A

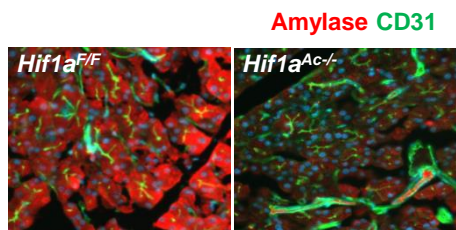

B

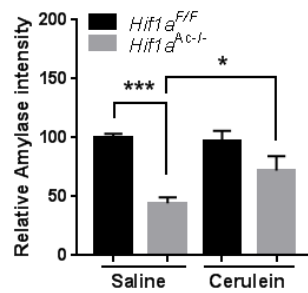

C

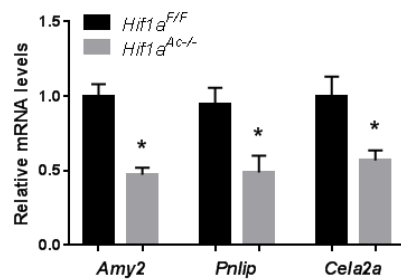

Supplementary Fig. 11

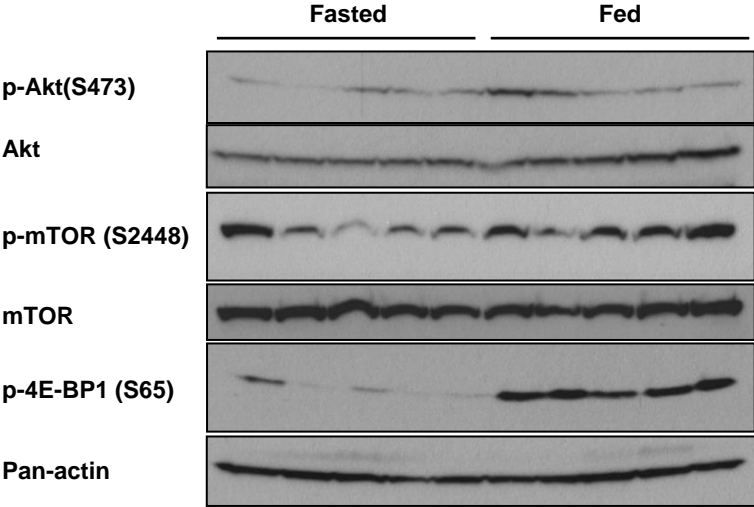

Supplement: NIHMS939462-supplement-2.pdf [file NIHMS939462-supplement-2.pdf]
